# Supplementary material for: Explicit calculation of the excited electronic states of the photosystem II reaction centre
Source: Royal Society of Chemistry journal article supplement (doi:10.1039/c4cp04468a), 2014-12-15
Supplement: c4cp04468a1.pdf [file c4cp04468a1.pdf]

# Explicit calculation of the excited electronic states of the photosystem II reaction centre: Supplementary Information

Terry J. Frankcombe\*

*Research School of Chemistry, Australian National University,*

*ACT 0200 Australia*

---

\*E-mail: [tjf@rsc.anu.edu.au](mailto:tjf@rsc.anu.edu.au)

Table S1: Excitation energies of a chlorophyll dimer (AB) with various modifications (eV). CAM-B3LYP/6-31G(d,p)

| Excitation | Character <sup>a</sup>        | Full chlorophyll | Truncated tail <sup>b</sup> | With diffuse <sup>c</sup> | With His <sup>d</sup> |
|------------|-------------------------------|------------------|-----------------------------|---------------------------|-----------------------|
| 1          | A*                            | 2.1291           | 2.1296                      | 2.0888                    | 2.1301                |
| 2          | B*                            | 2.1771           | 2.1779                      | 2.1409                    | 2.1802                |
| 3          | A*                            | 2.5588           | 2.5595                      | 2.5299                    | 2.4762                |
| 4          | B*                            | 2.5682           | 2.5689                      | 2.5391                    | 2.5010                |
| 5          | A <sup>+</sup> B <sup>-</sup> | 2.7152           | 2.7161                      | 2.6743                    | 2.7744                |
| 6          | A <sup>-</sup> B <sup>+</sup> | 2.7158           | 2.7166                      | 2.6773                    | 2.7805                |
| 7          | A <sup>+</sup> B <sup>-</sup> | 3.2444           | 3.2456                      | 3.2060                    | 3.2317                |
| 8          | A <sup>-</sup> B <sup>+</sup> | 3.2453           | 3.2465                      | 3.2075                    | 3.2419                |
| 9          | A*                            | 3.4027           | 3.4047                      | 3.3466                    | 3.3832                |
| 10         | B*                            | 3.4152           | 3.4185                      | 3.3542                    | 3.4047                |

<sup>a</sup> Principle nature of excited state

<sup>b</sup> Truncated at ether, converted to carboxylic acid

<sup>c</sup> Truncated tail configuration, CAM-B3LYP/6-31+G(d,p)

<sup>d</sup> Truncated Chl and protonated His, Chl–His monomer optimised in gas phase

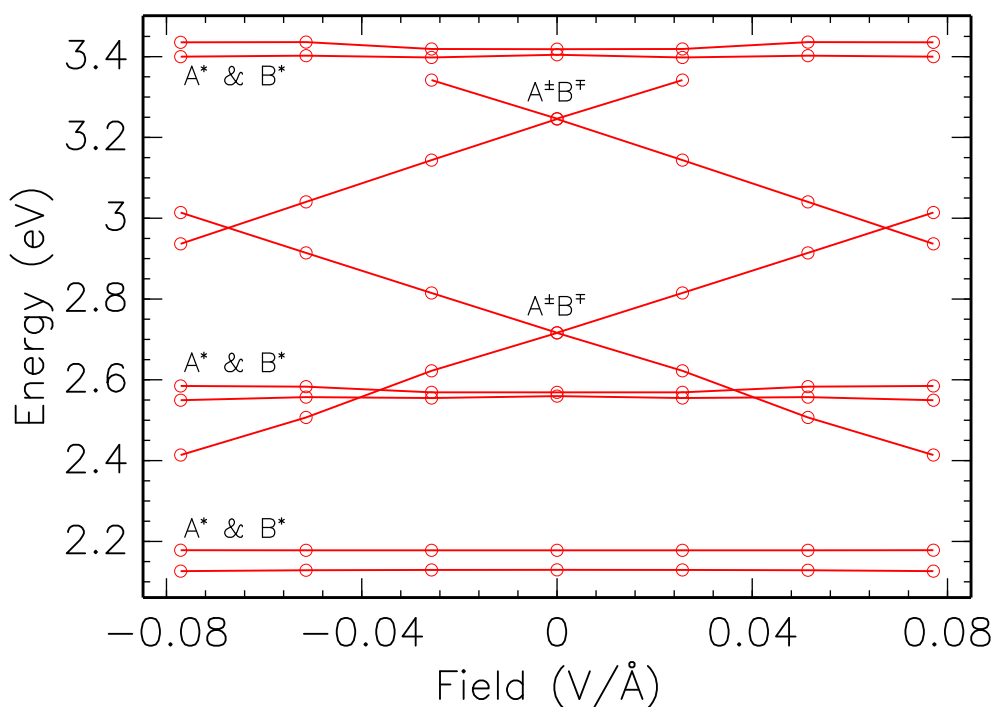

Figure S1: Excitation energies of a dimer of truncated chlorophyll molecules (3.8 Å separation between the planes of the rings) under a uniform external electric field. The field is oriented approximately along the vector between the centres of the chlorophylls.
